# Supplementary material for: Mediterranean Coastal Lagoons Review: Sites to Visit before Disappearance
Source: MDPI journal article supplement (doi:10.3390/jmse10030347), 2022-03-01
Supplement: s1 [file s1]

## Supplementary materials.

**Figure S1.** False color image of each Mediterranean lagoon studied in summer 2020. Base bands RGB are 4, 3 and 2 of satellite Landsat-8 OLI mission. Product downloaded from Google Earth Engine Explorer.

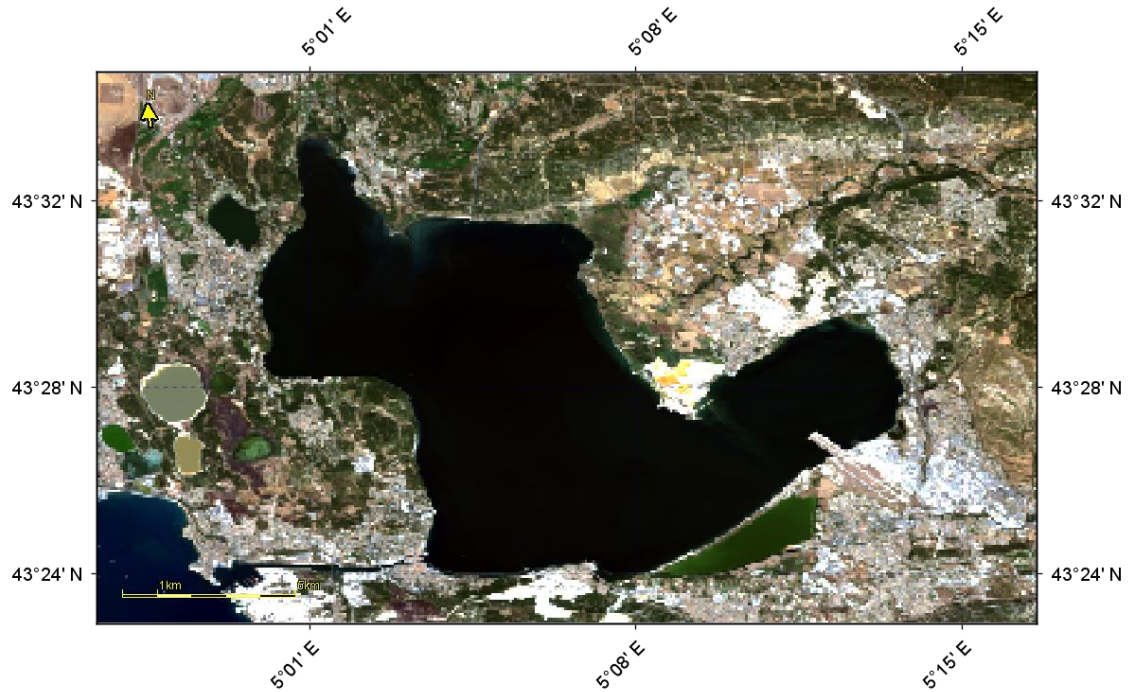

1 La Berre (France)

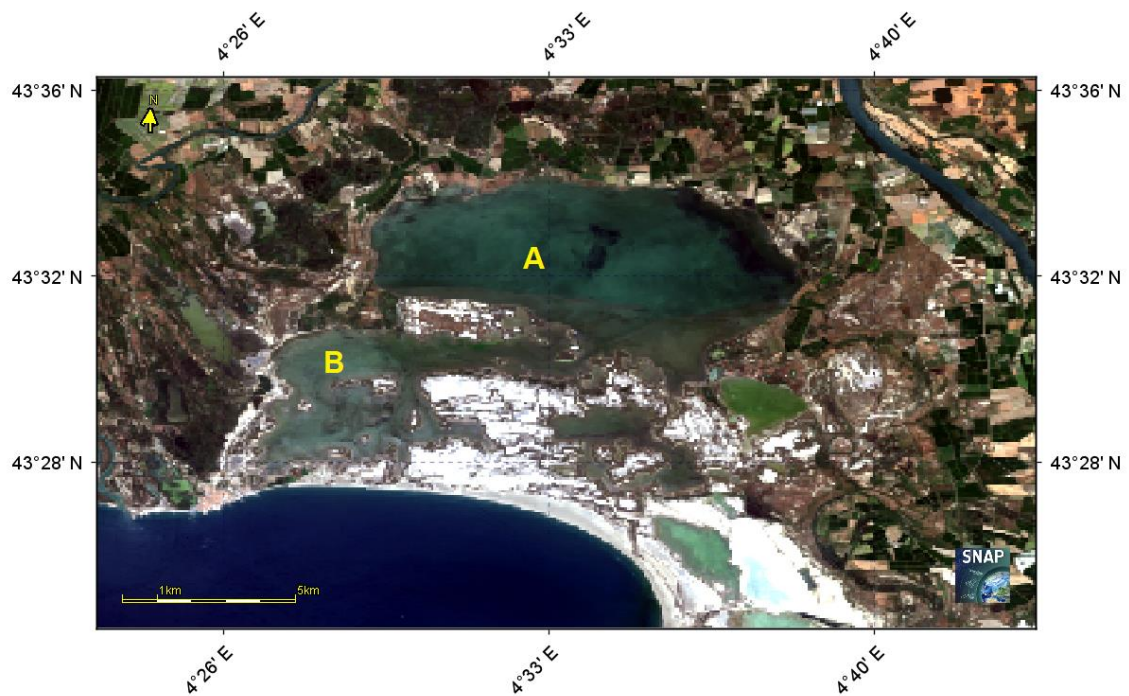

2 a) Vaccarès – b) Monro (France).

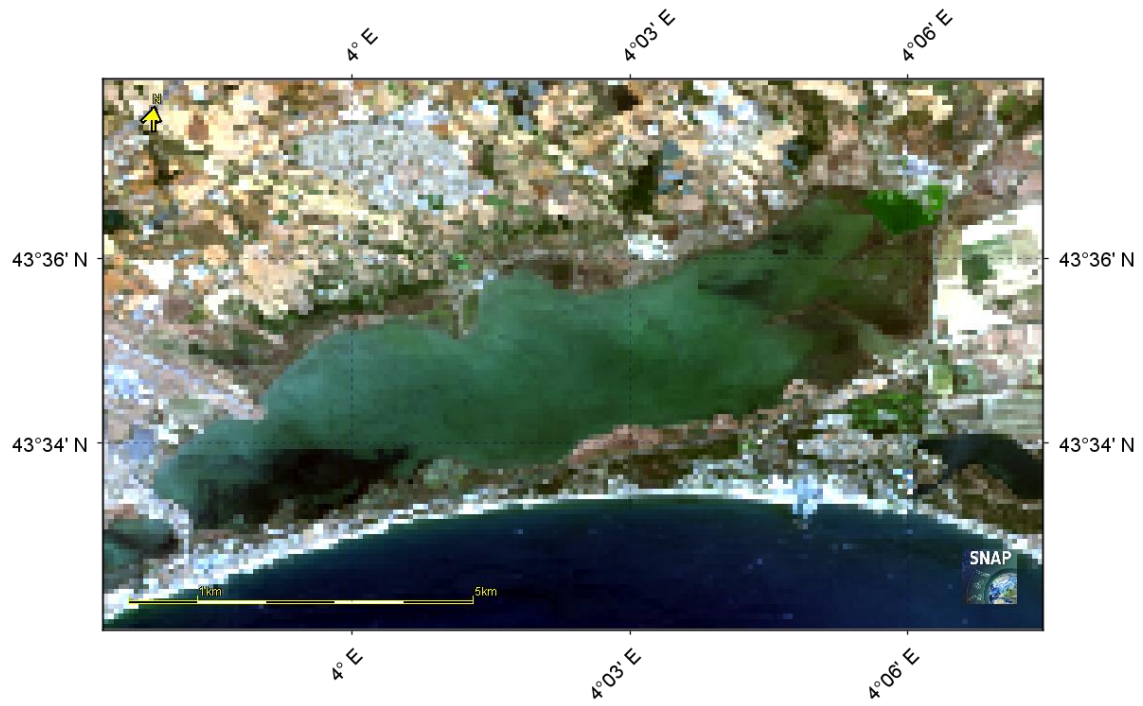

3 Etang d'Or (France)

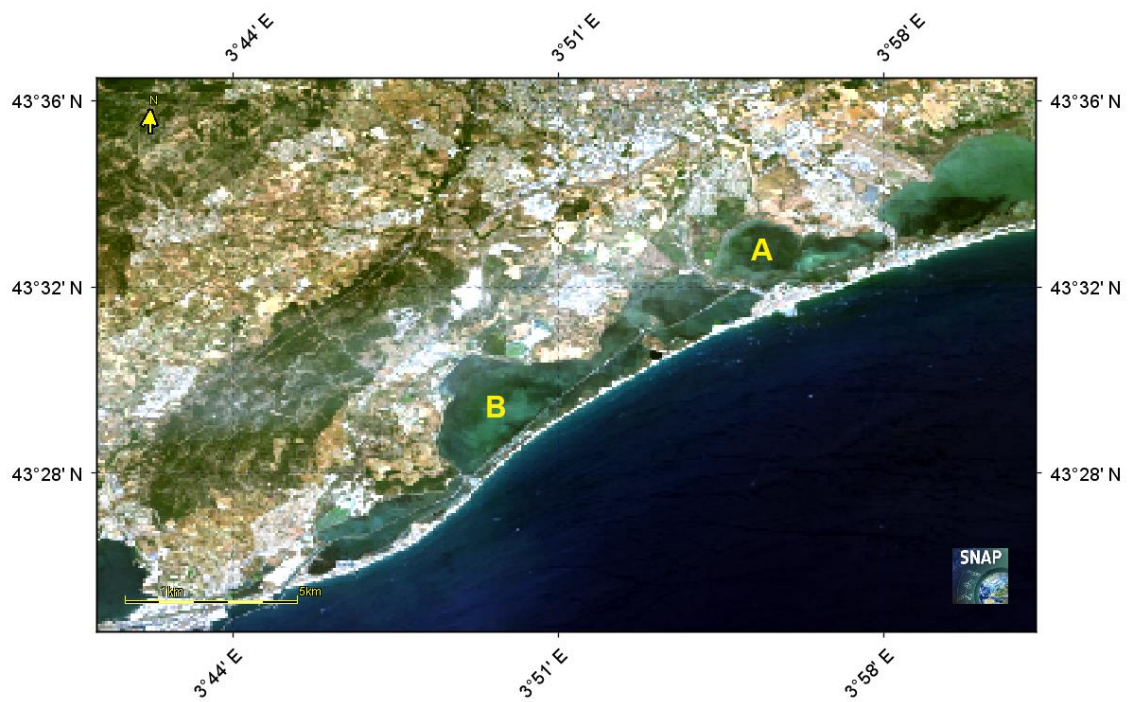

4 a) Perols – b) Vic (France)



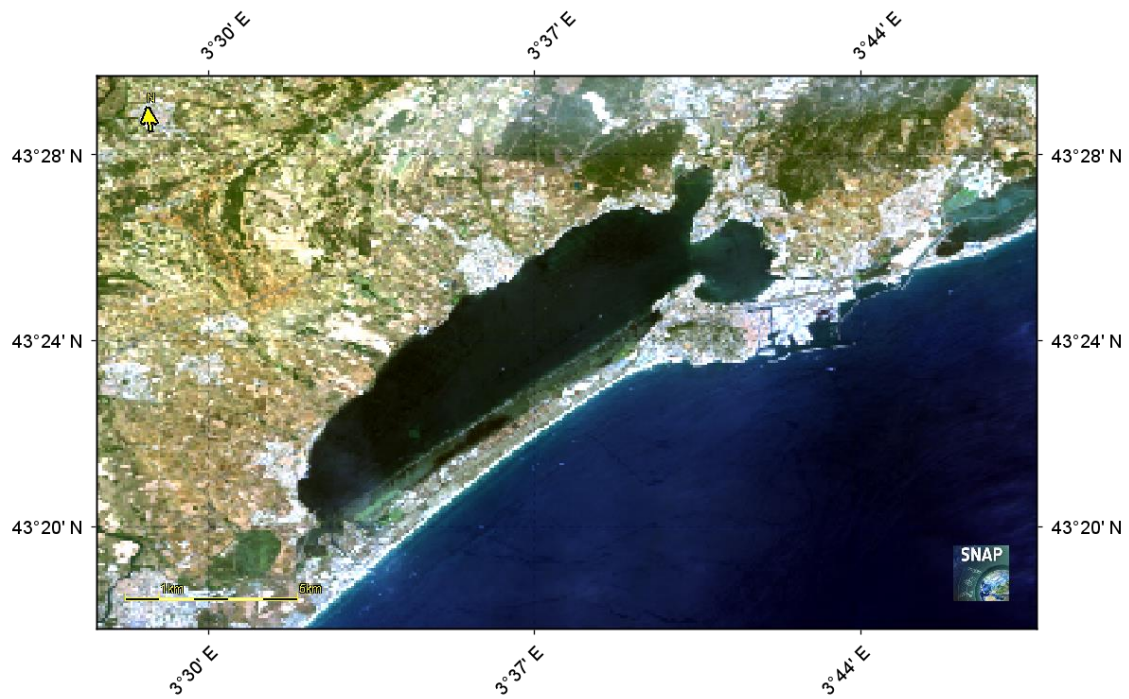

5 Thau (France)

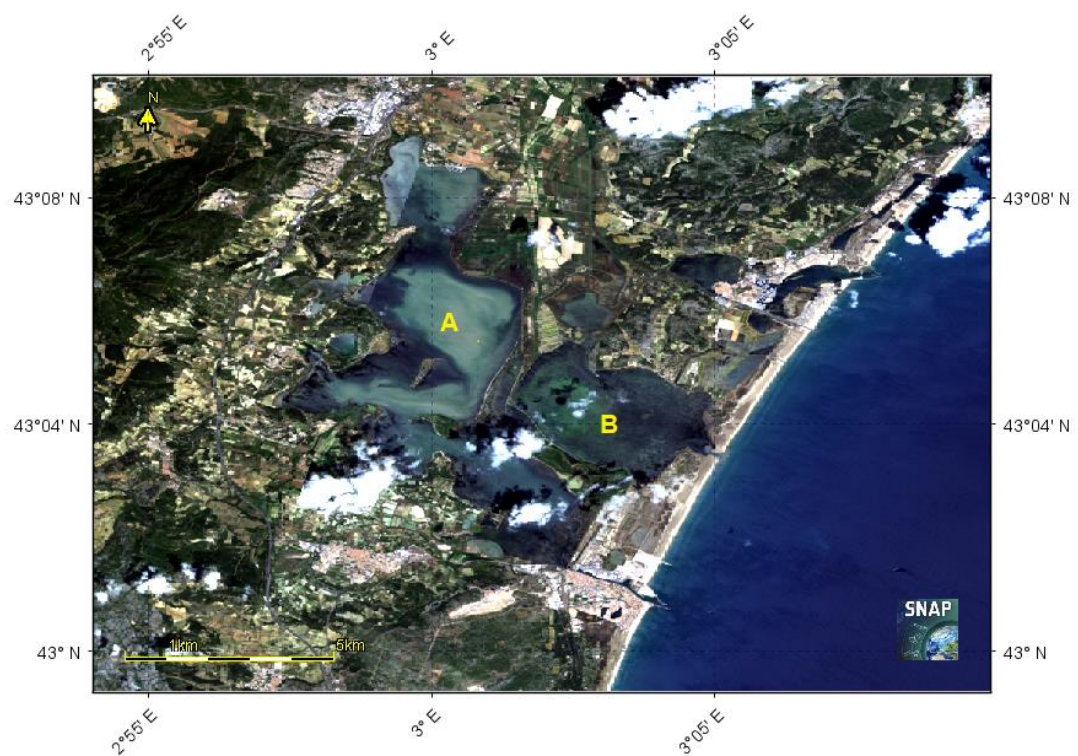

6 a) Bages – b) Sigean (France)

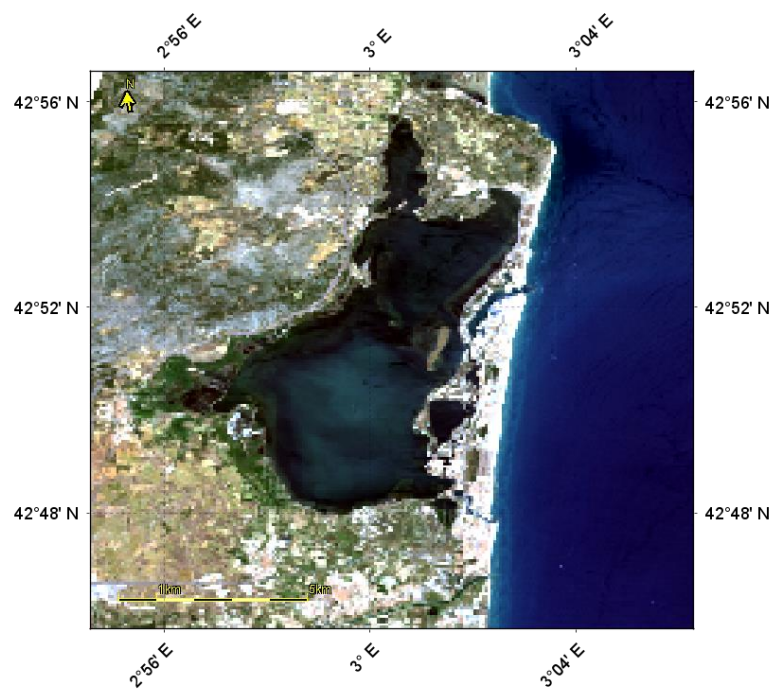

7 Leucate (France)

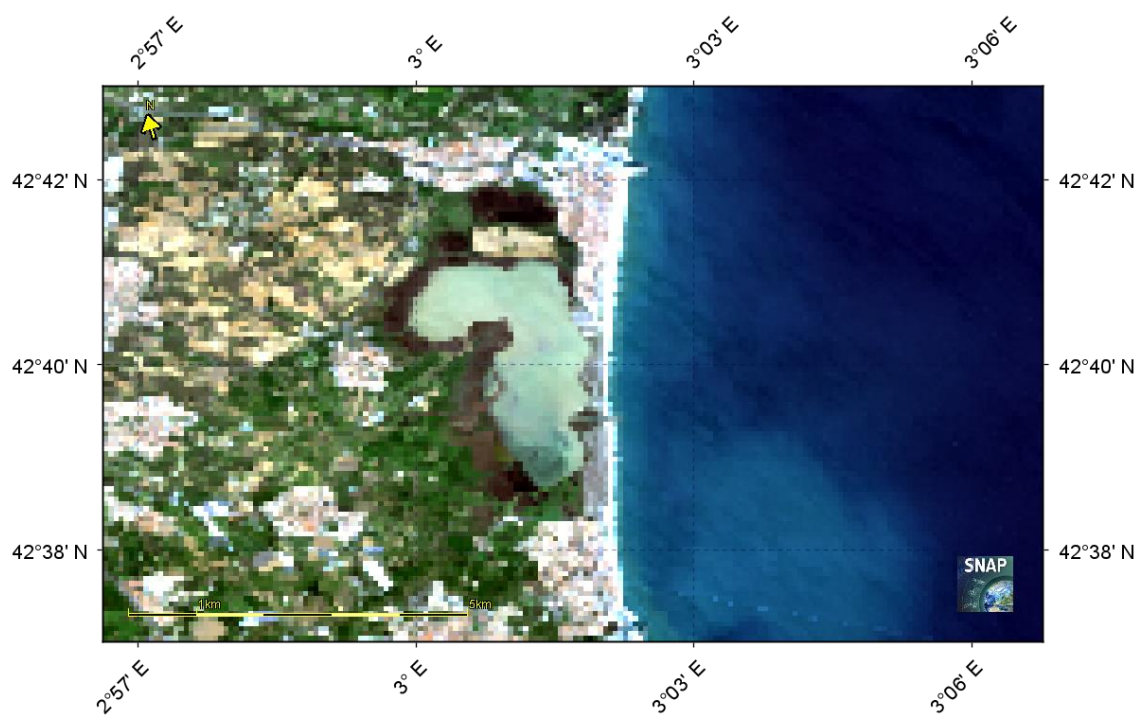

8 Saint Nazaire (France)



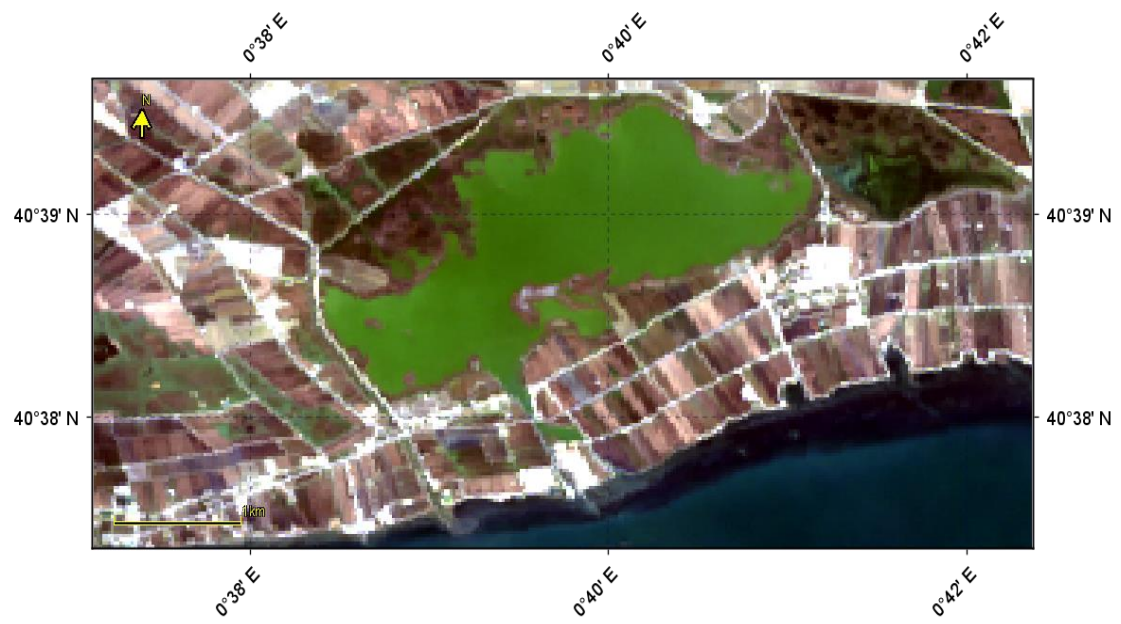

9 Clot (Spain)

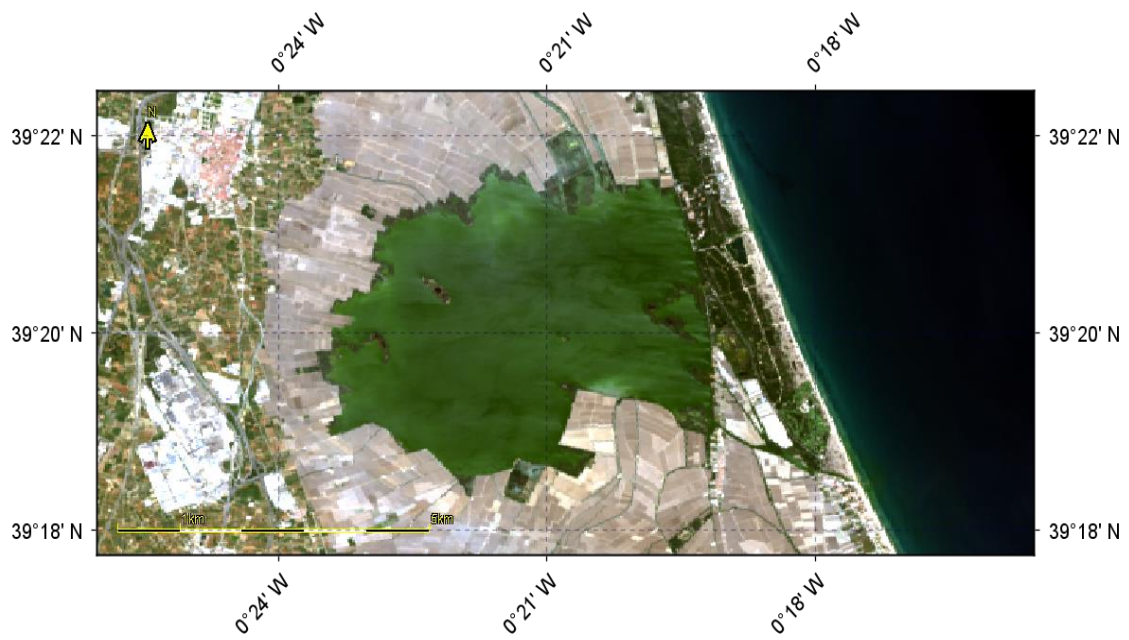

10 Albufera (Spain)

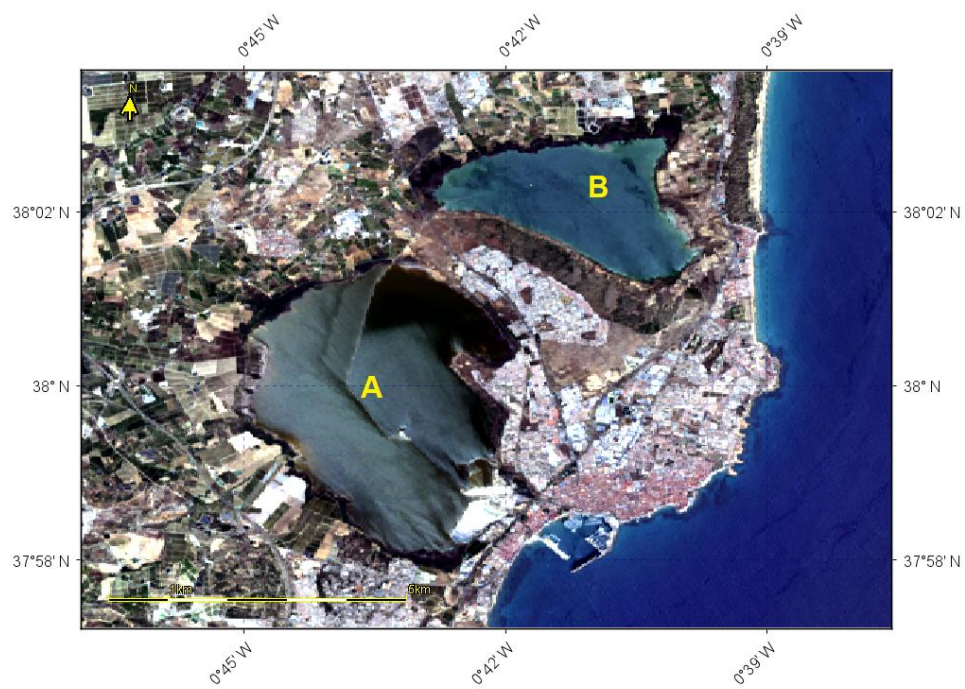

11 a) Torrevieja – b) La Mata (Spain)

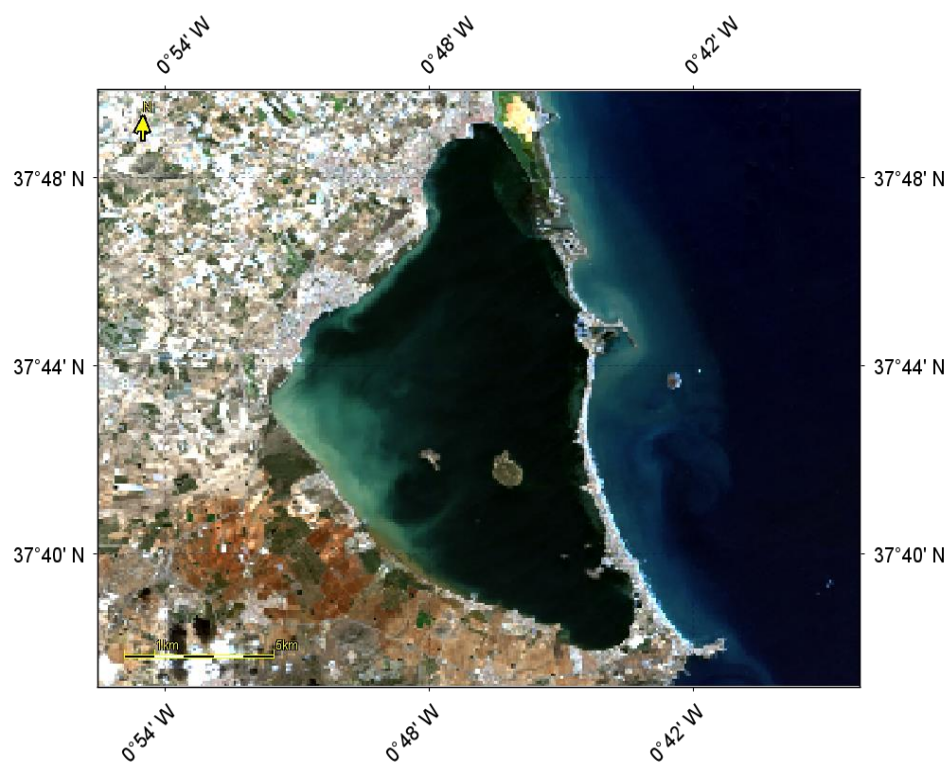

12 Mar Menor (Spain)



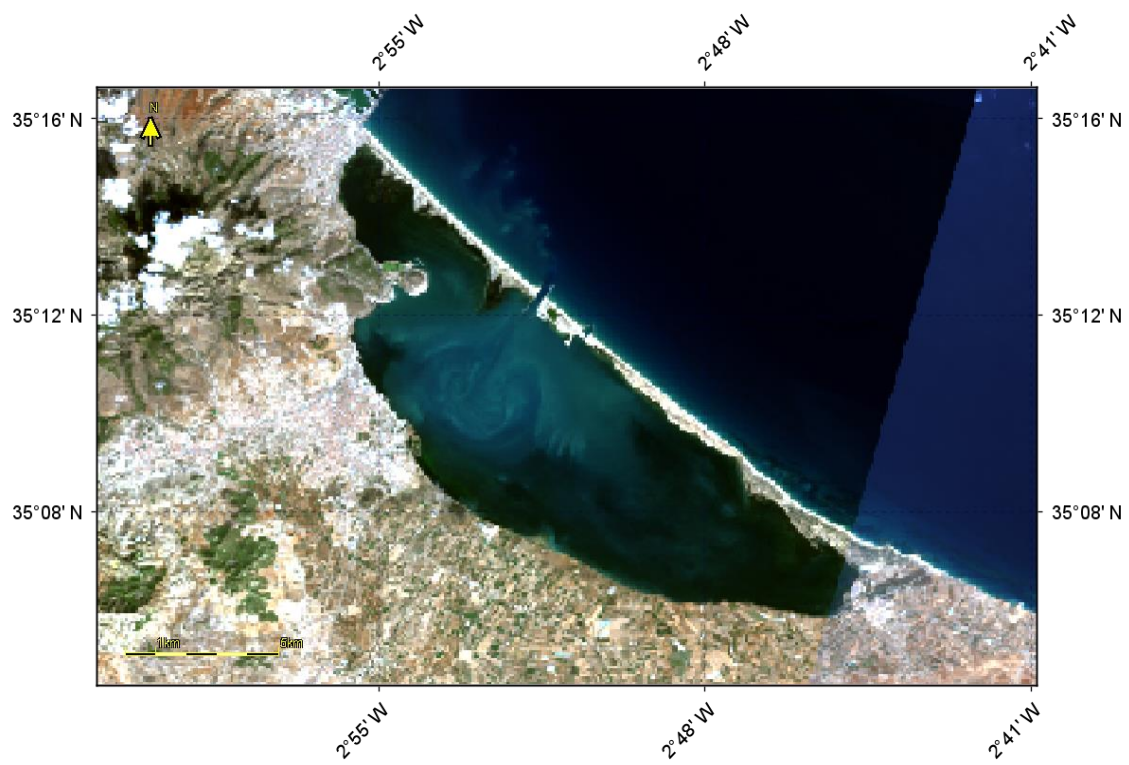

13 Marchica or Nador (Morocco)

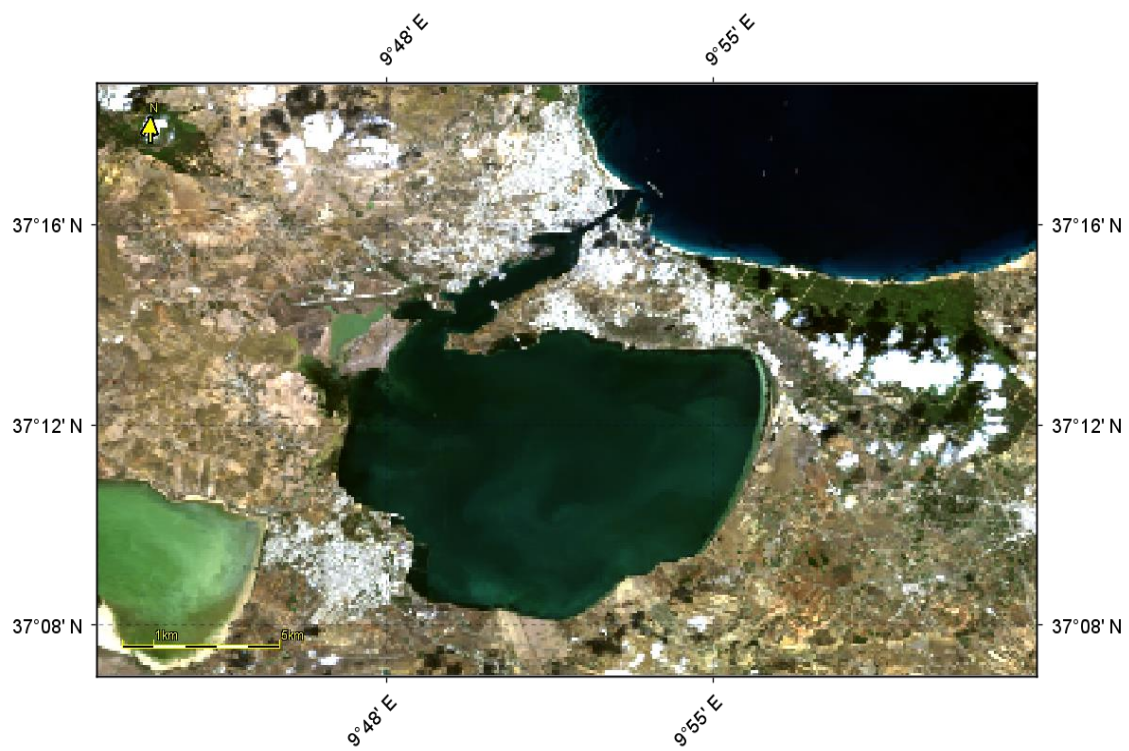

14 Bizerte (Tunis)

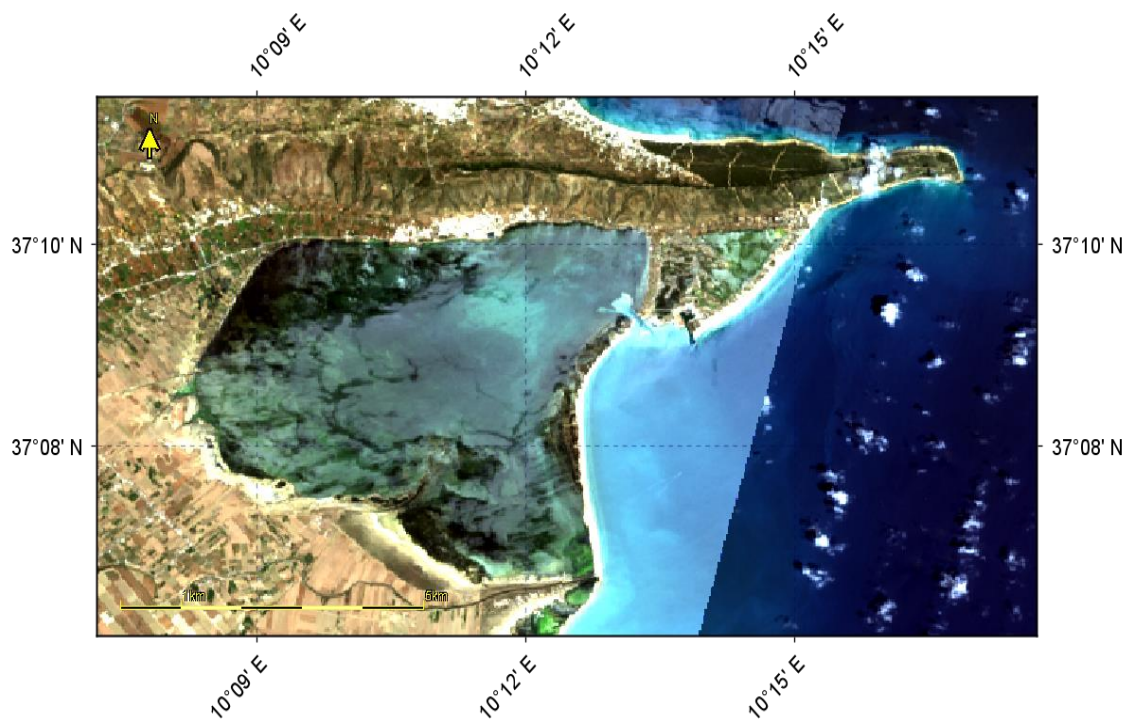

15 Ghar El Melh (Tunis)

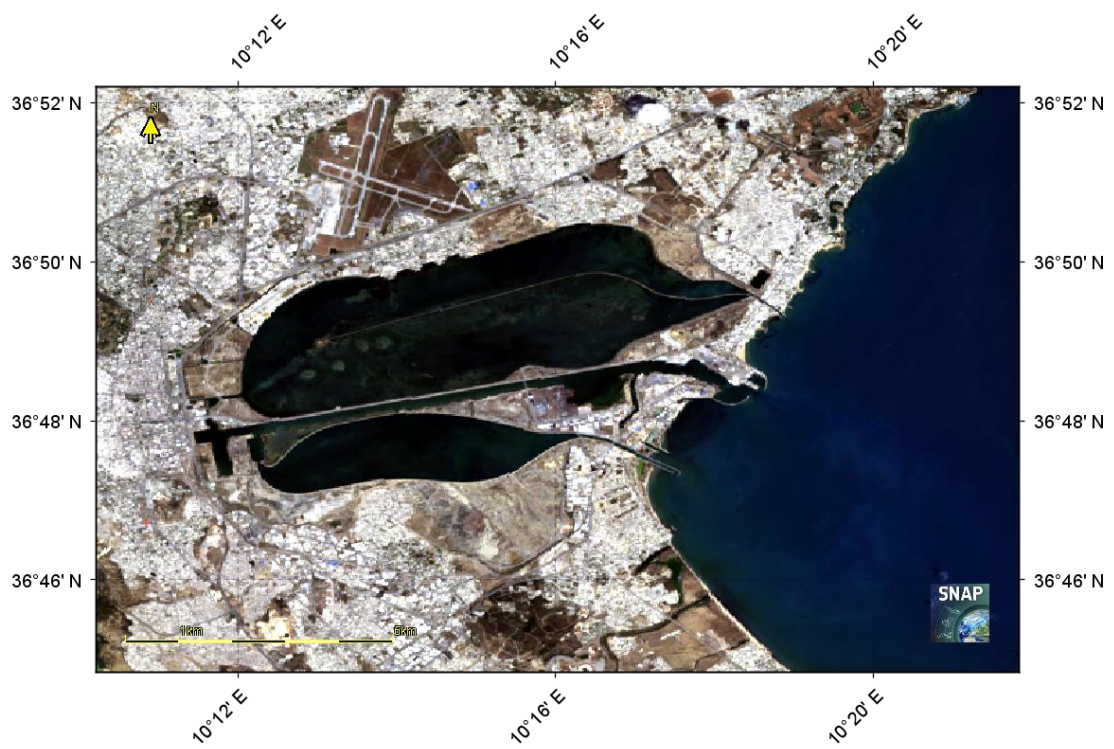

16 Tunis (Tunis)



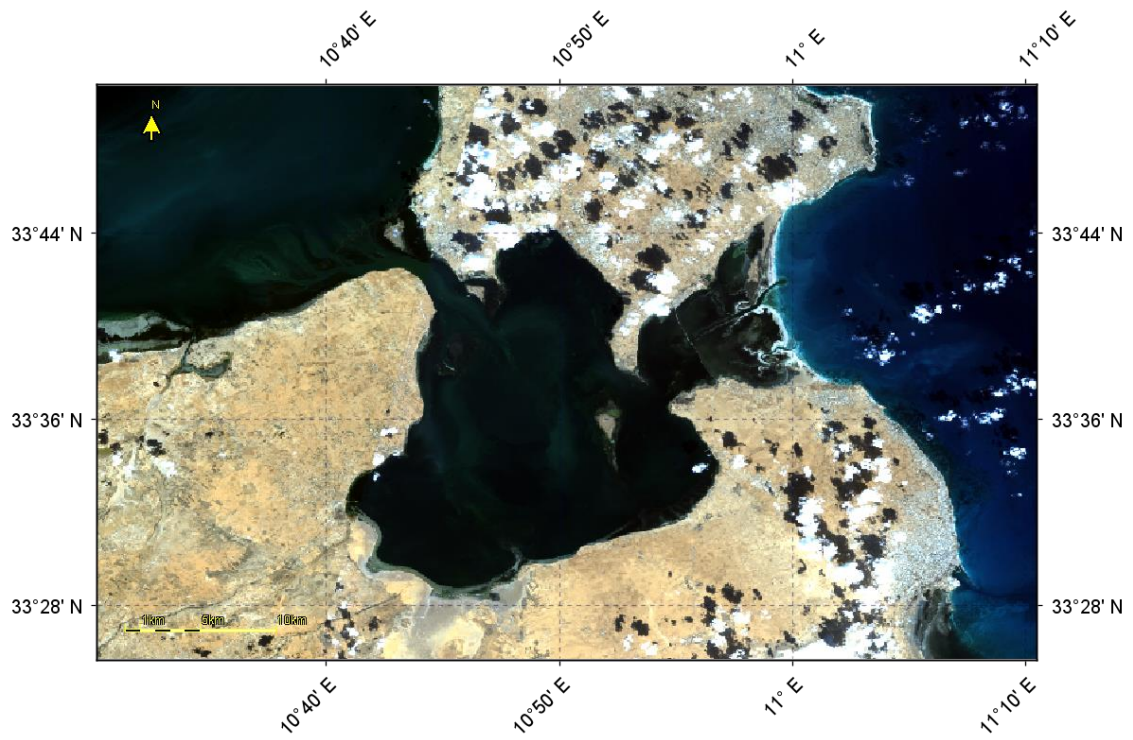

17 Boughrara (Tunis)

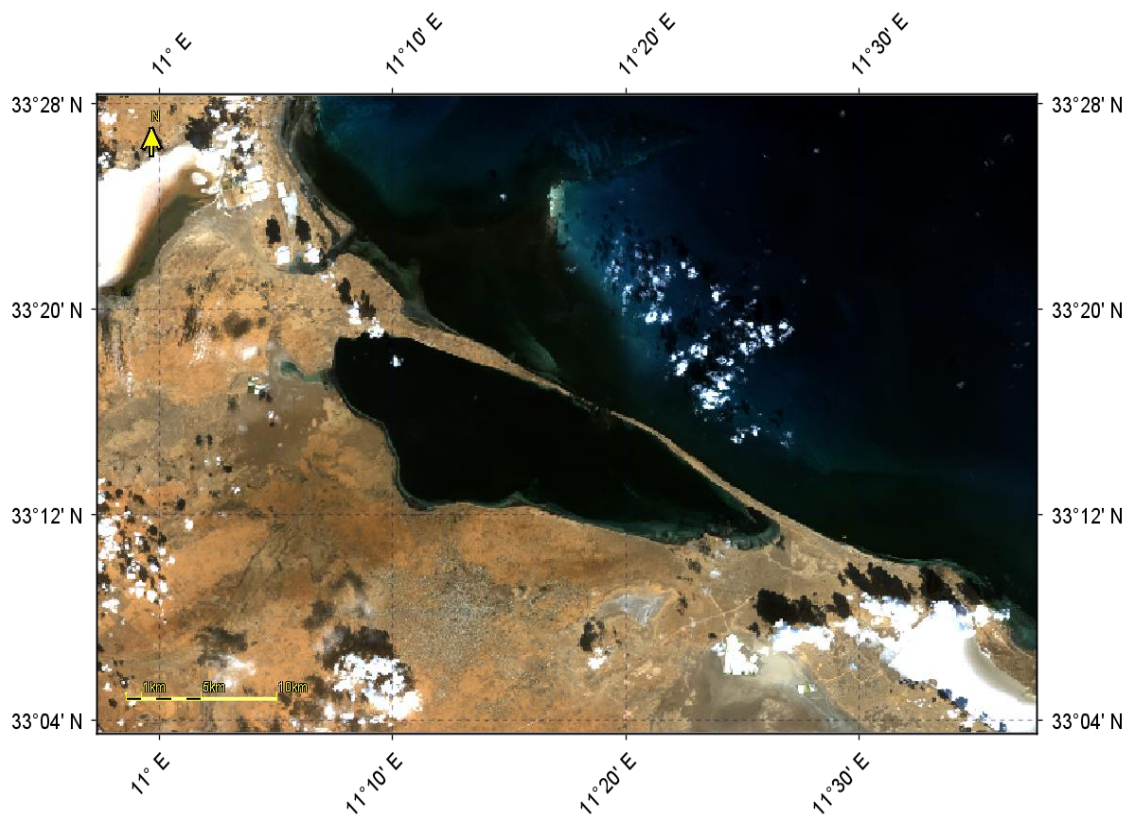

18 El Bibane (Tunis)

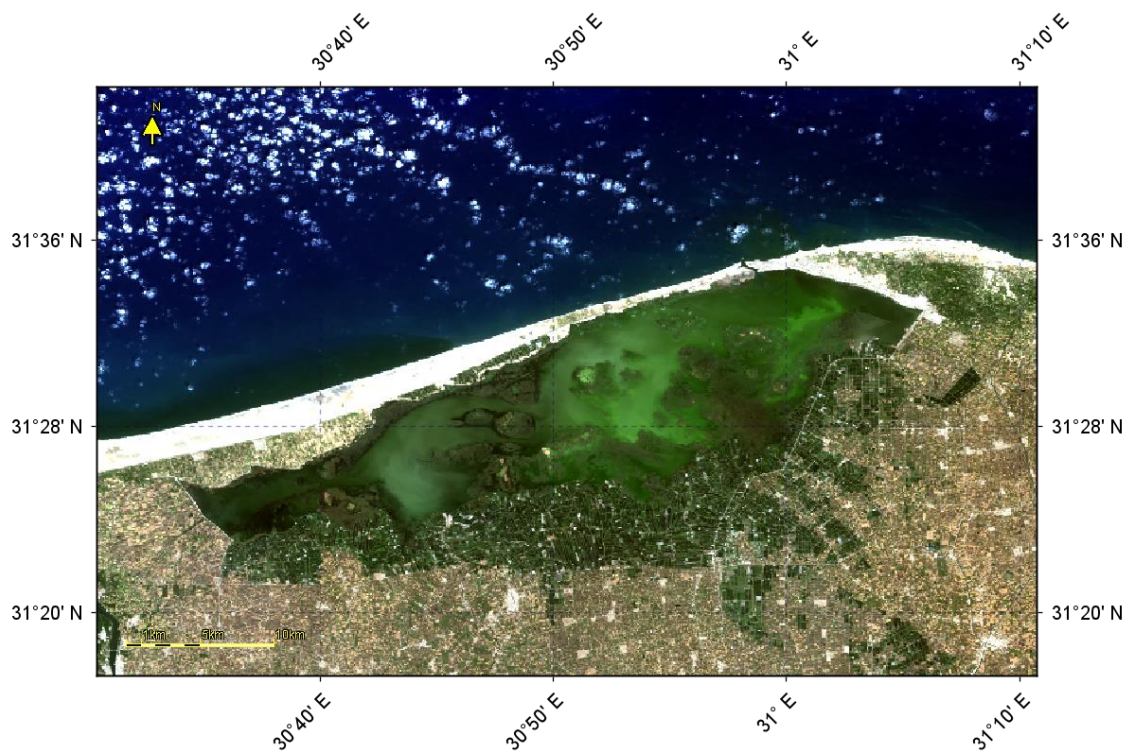

19 Burullus (Egypt)

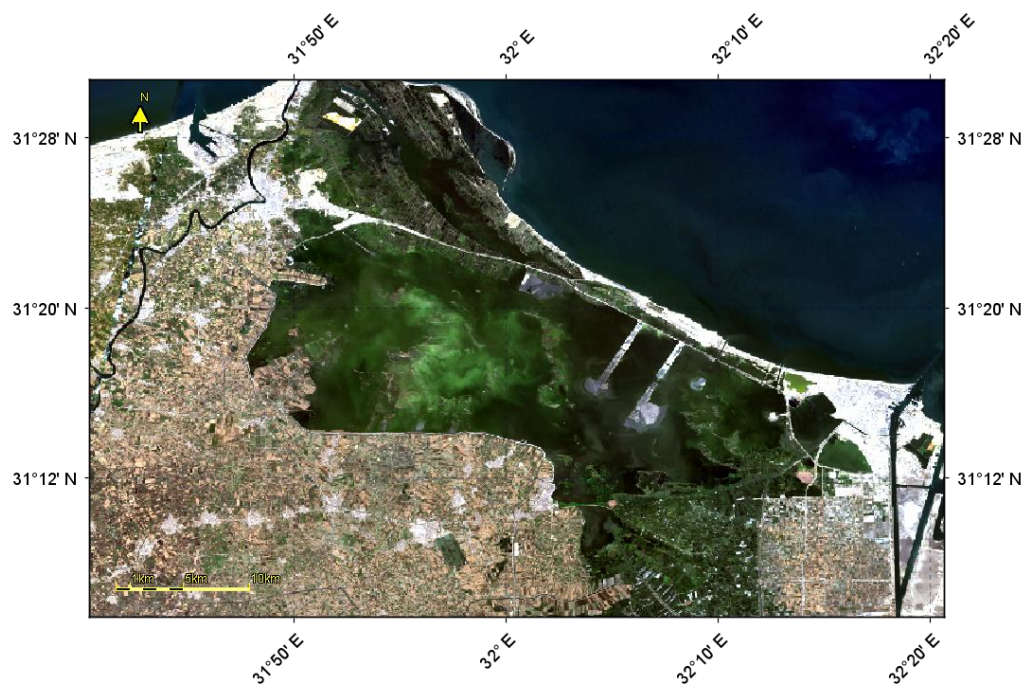

20 Manzala (Egypt)



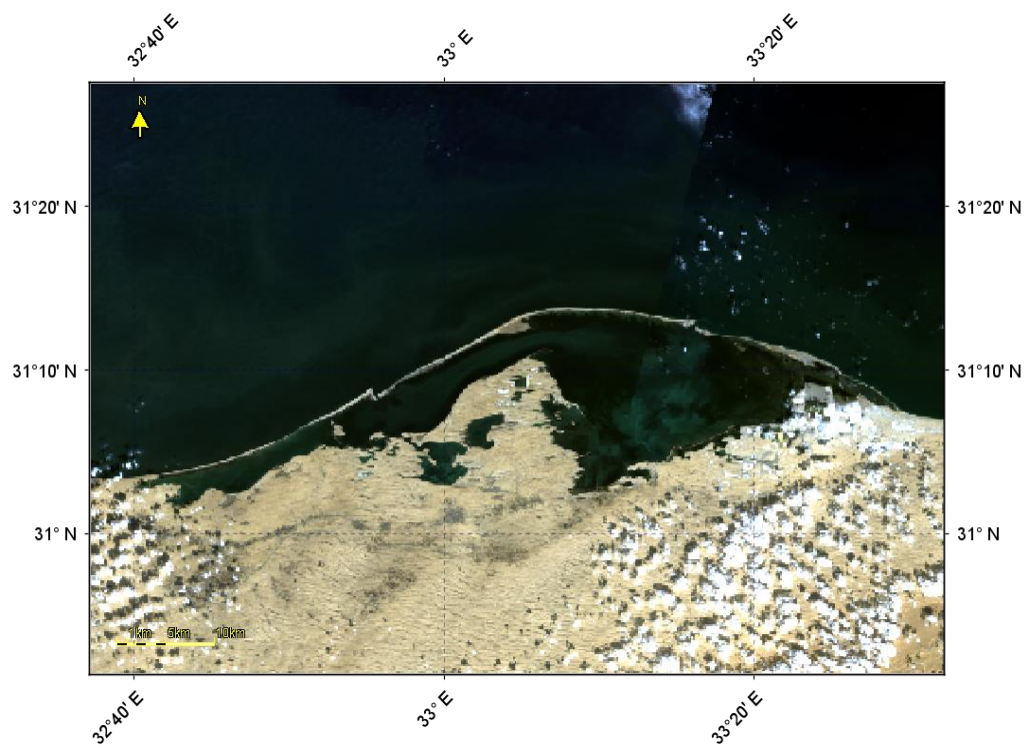

21 Bardawil (Egypt)

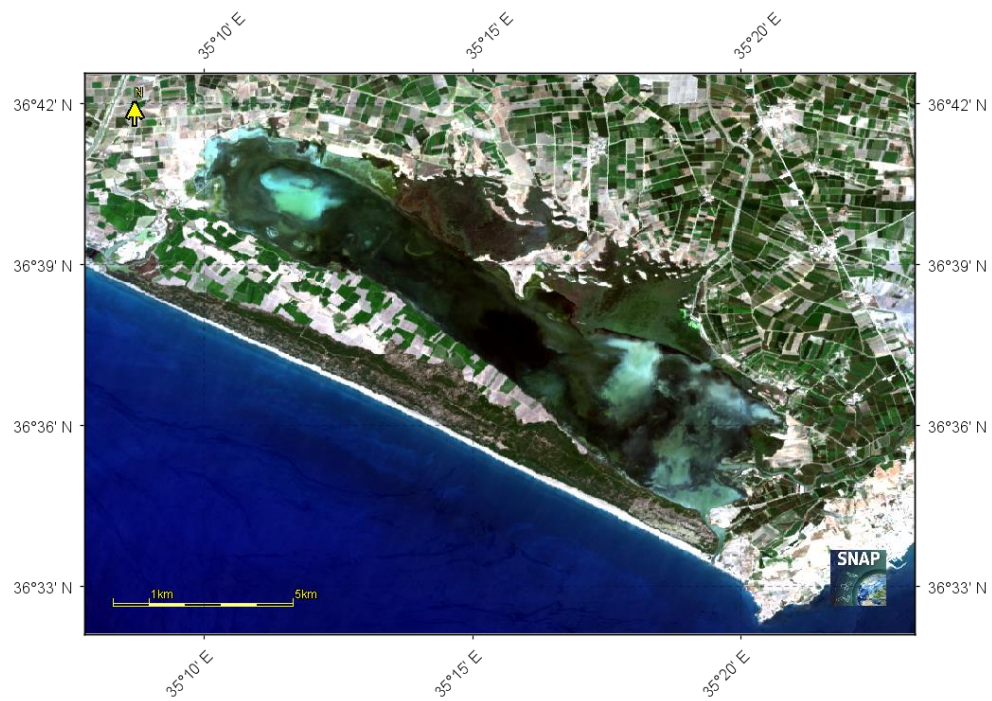

22 Akyatan (Turkey)

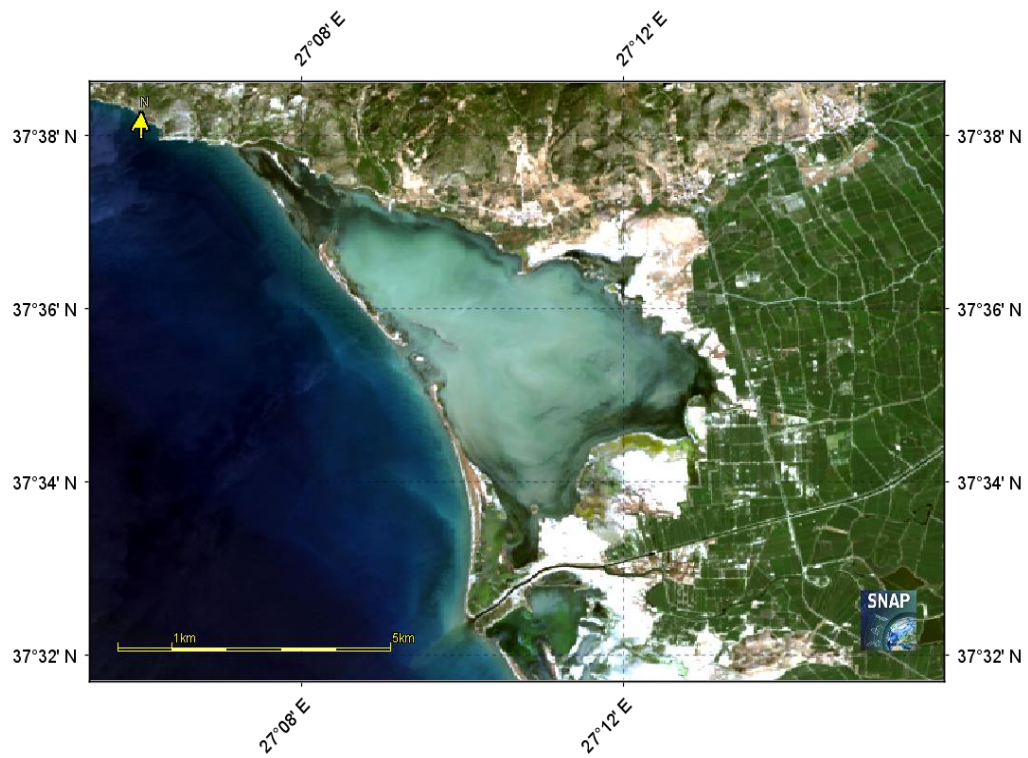

23 Karine (Turkey)

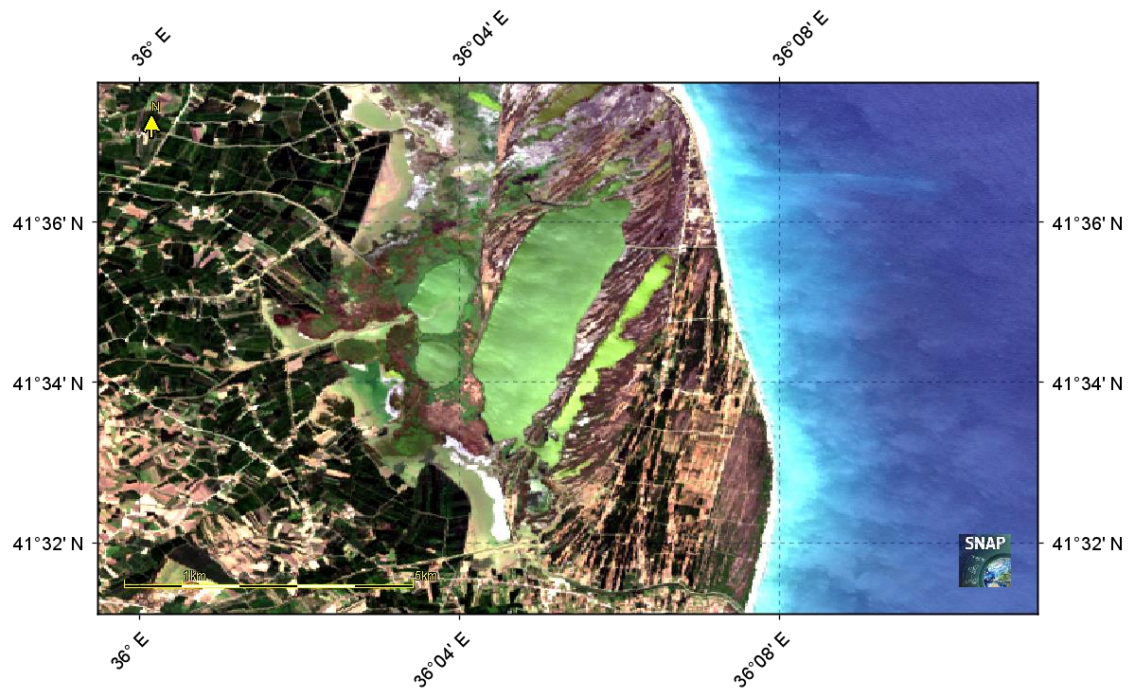

24 Balık (Turkey)



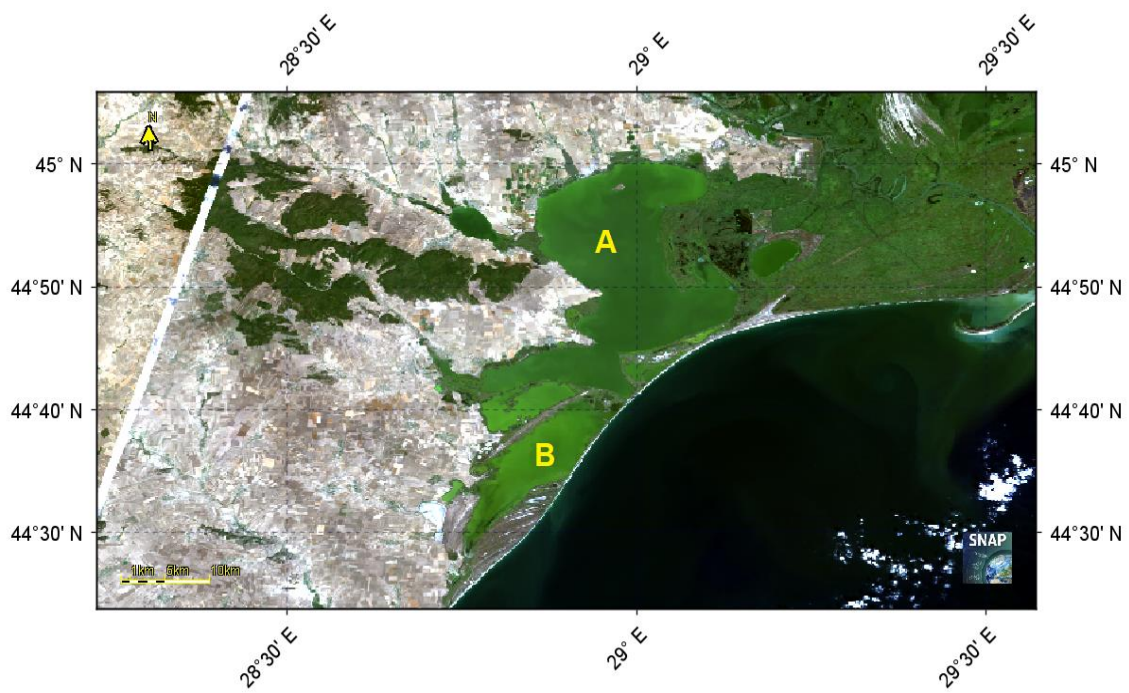

25 a) Razim – b) Sinoie (Romania)

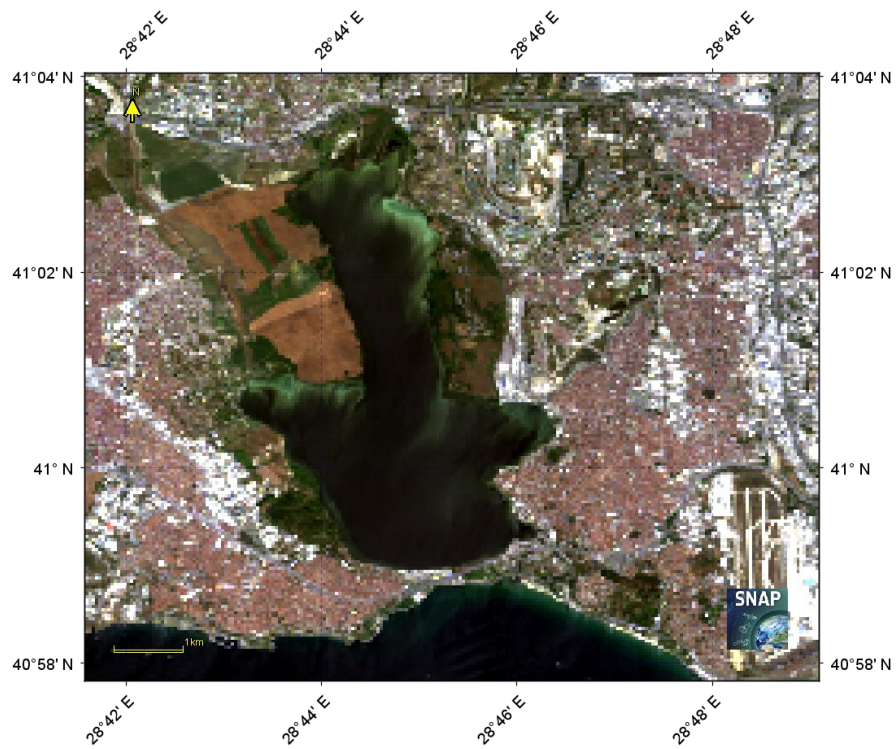

26 Kucukcekmece (Turkey)

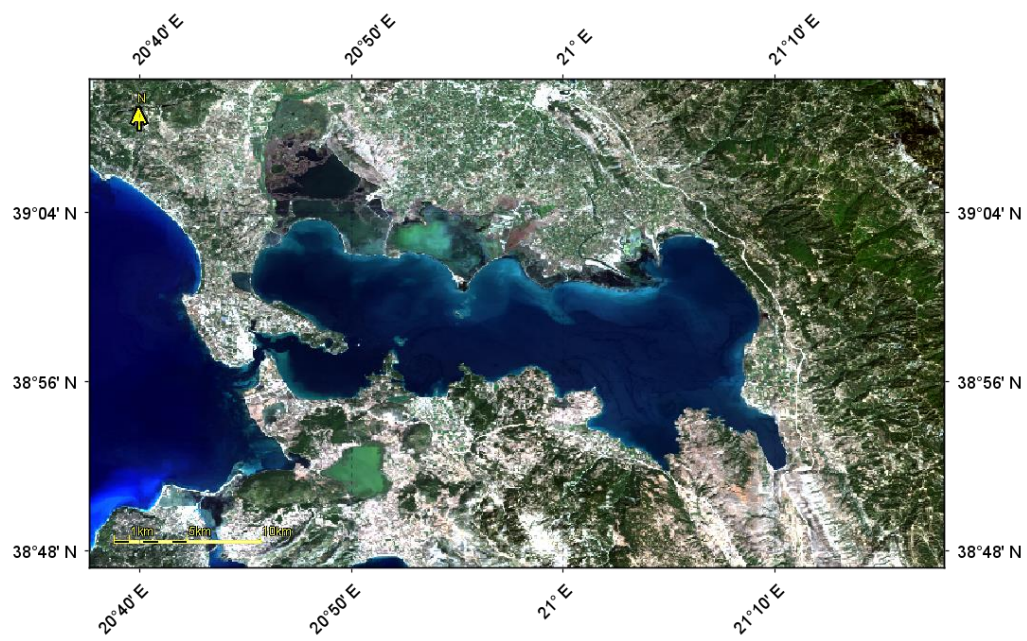

27 Amvrakikos (Greece)

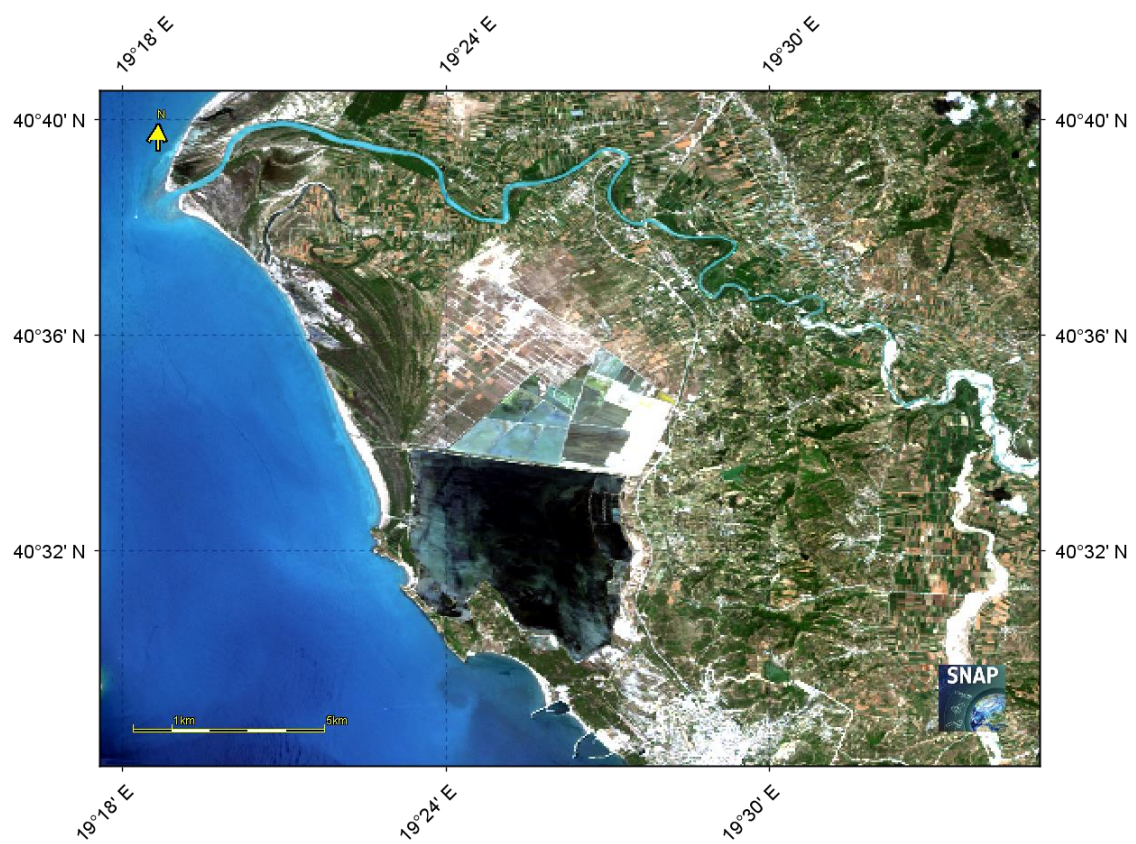

28 Nartes (Albania)



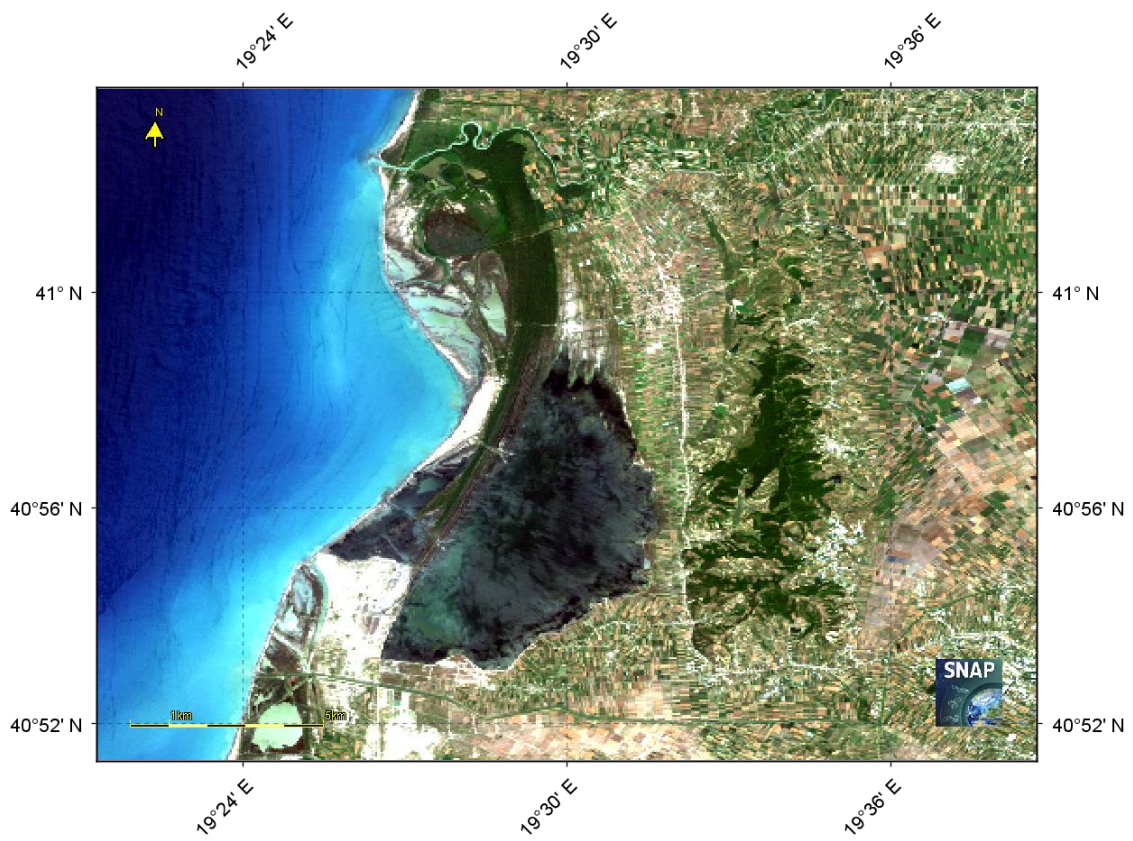

29 Karavasta (Albania)

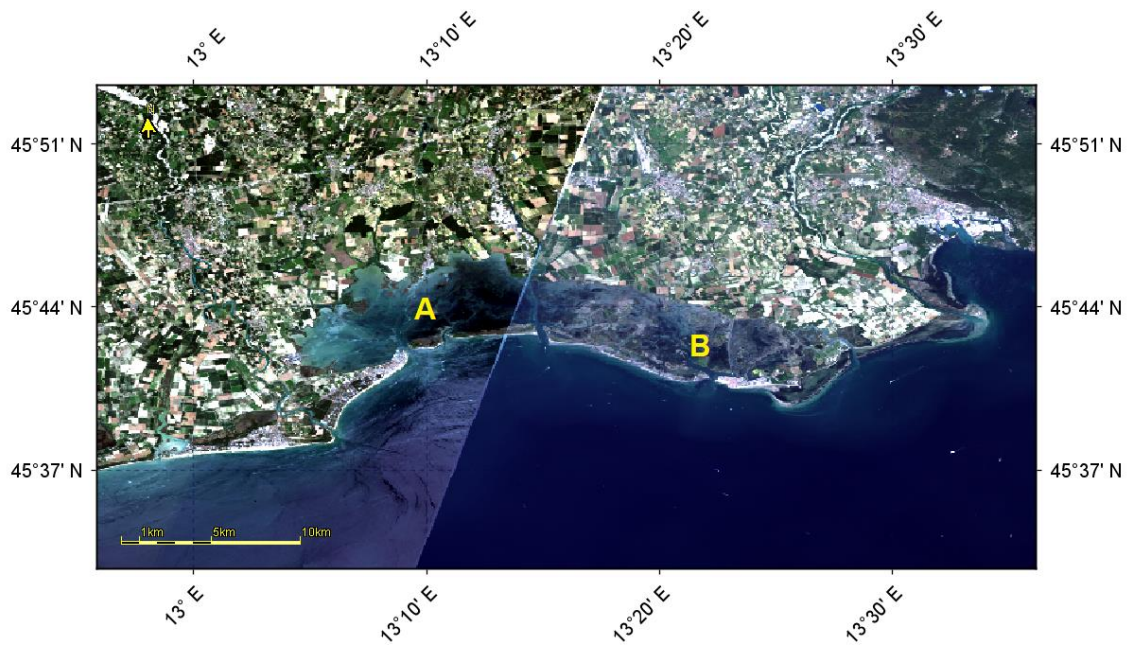

30 a) Marano – b) Grado (Italy)

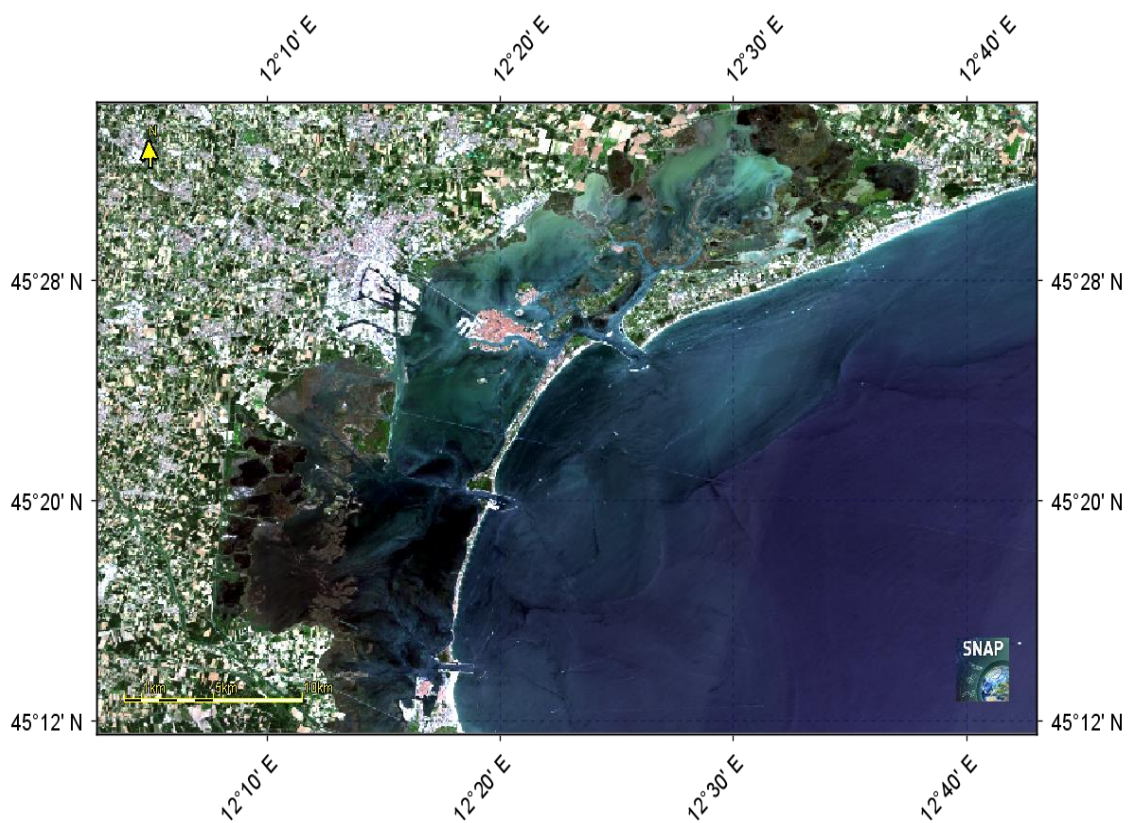

31 Venezia (Italy)

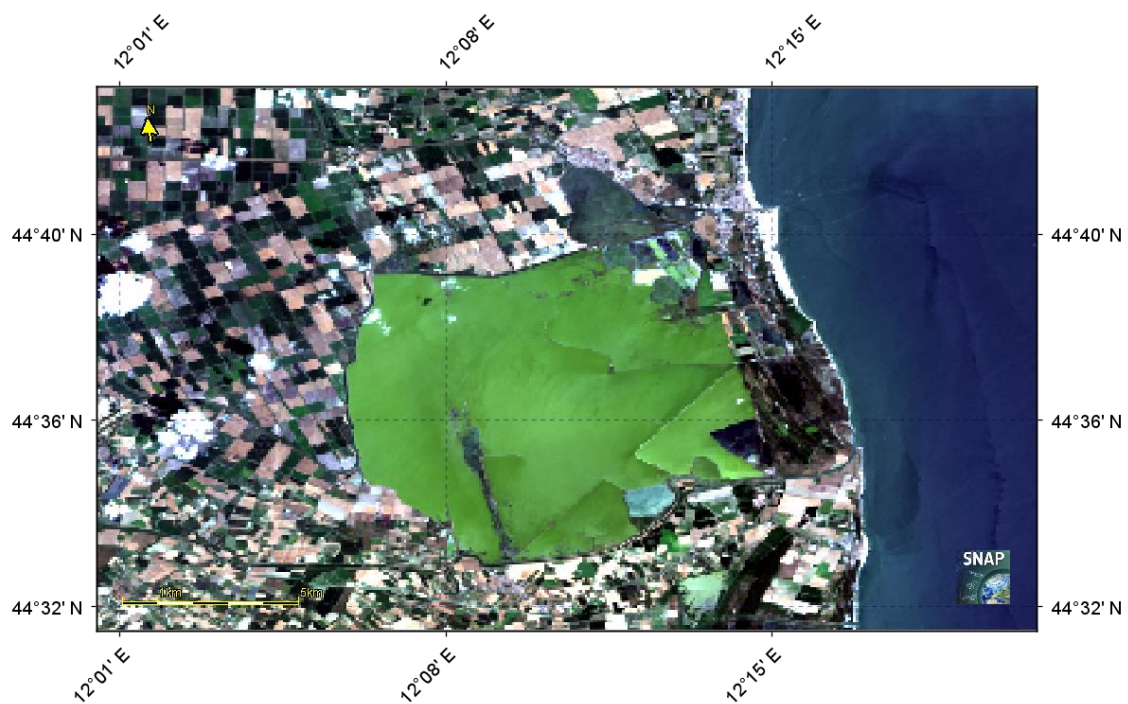

32 Comacchio (Italy)



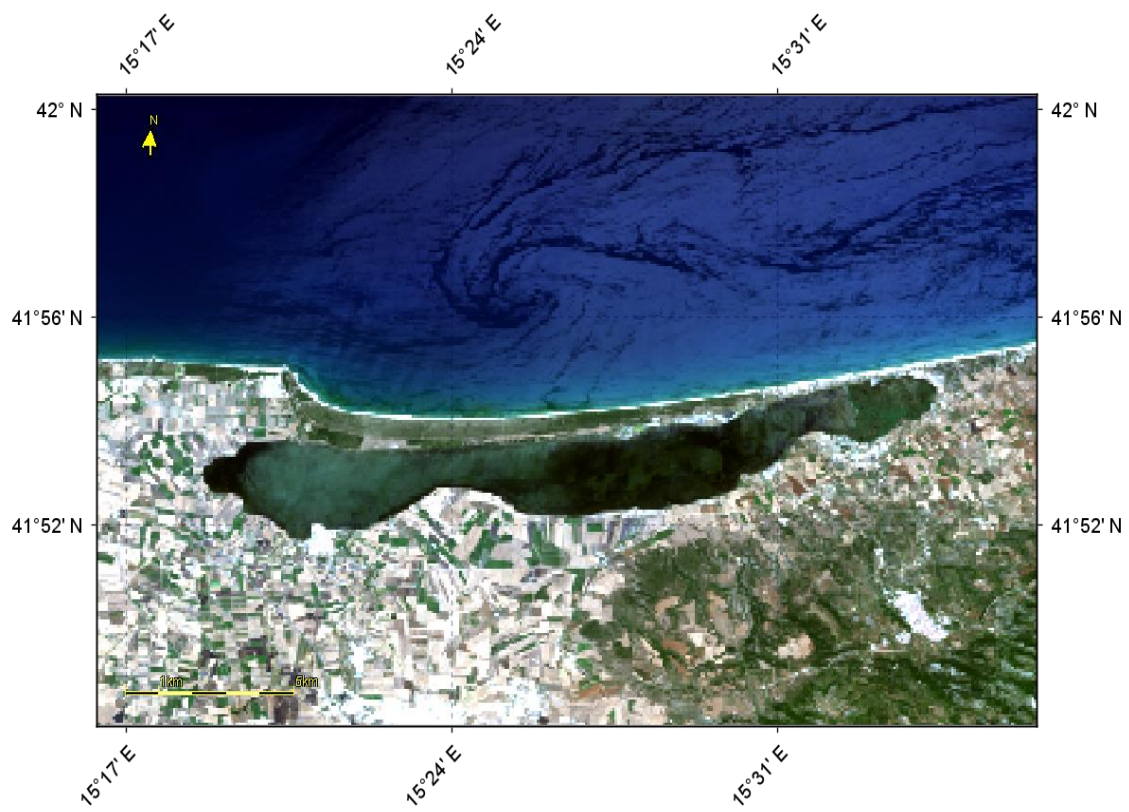

33 Lesina (Italy)

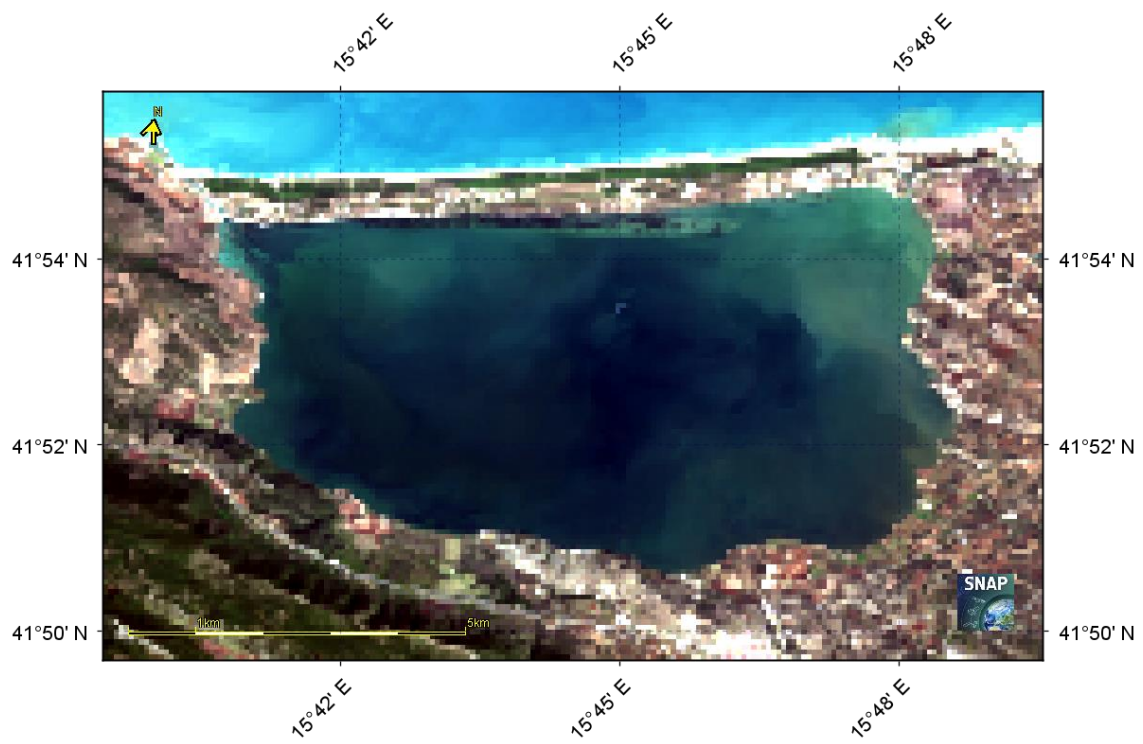

34 Varano (Italy)

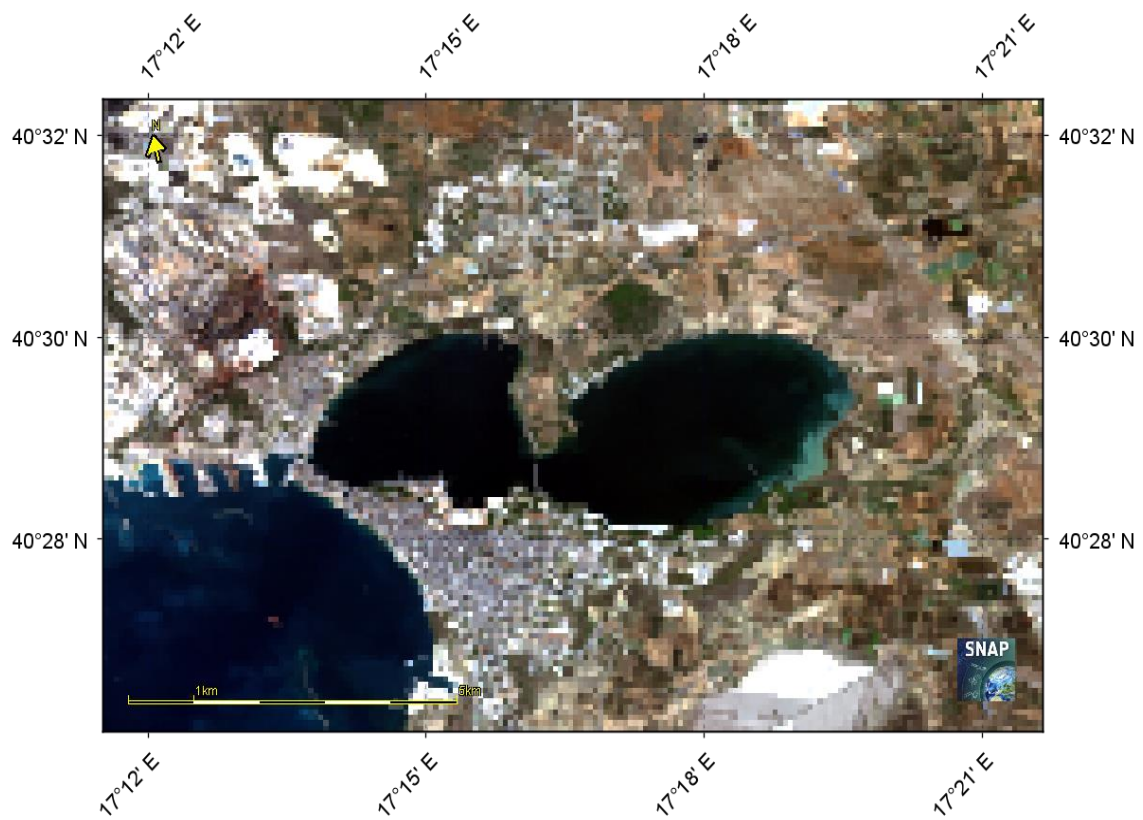

35 Mare Piccolo (Italy)

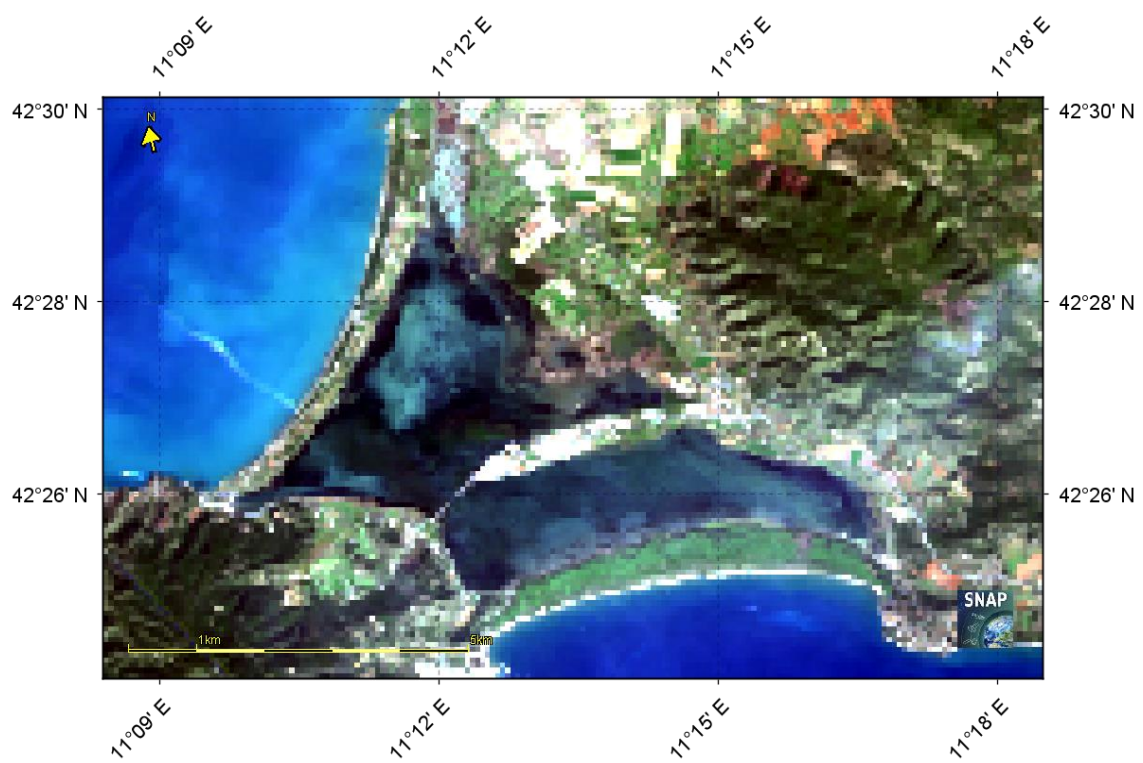

36 Orbetello (Italy)



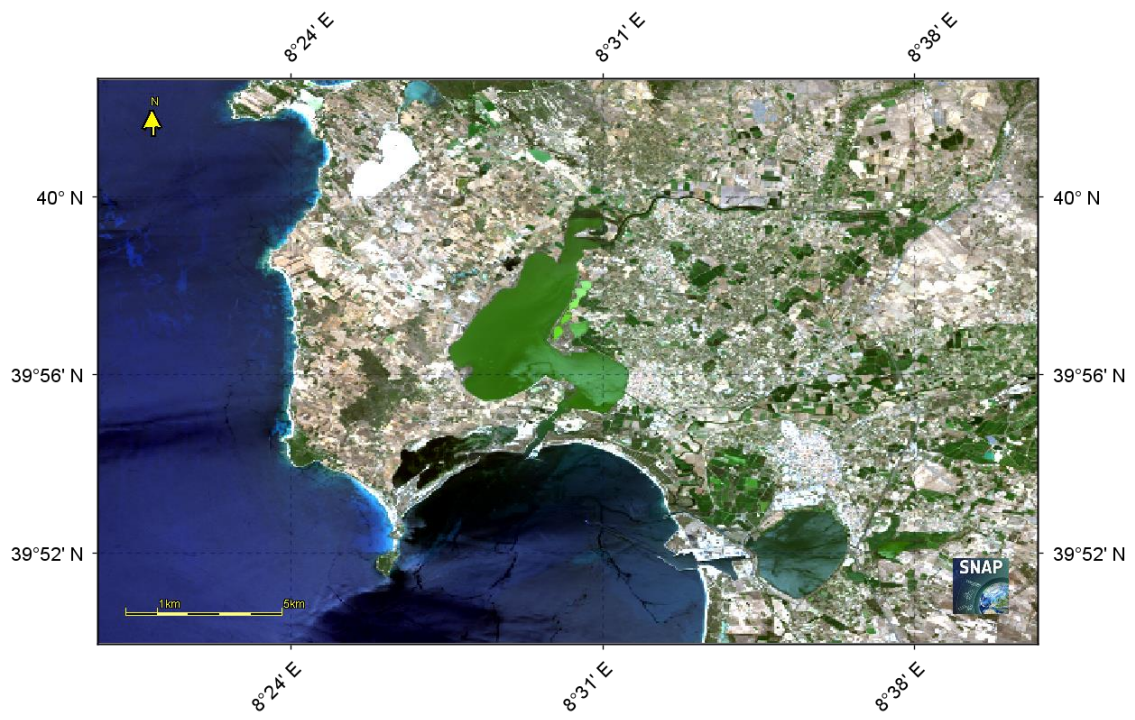

37 Cabras (Italy)
